# Supplementary material for: DNA strand breaks and gaps target retroviral intasome binding and integration
Source: PubMed Central journal article supplement (PMC10624929; doi:10.1038/s41467-023-42641-4), 2023-11-03
Supplement: 41467_2023_42641_MOESM3_ESM.pdf [file 41467_2023_42641_MOESM3_ESM.pdf]

## **Description of Additional Supplementary Files**

File Name: Supplementary Movie 1

Description: Representative movie showing single molecule FRET imaging of Cy3-PFV intasome interaction with a Cy5-duplex (G/C) DNA at 100 msec frame rate. Cy3 emission (left); Cy5 emission (right).

File Name: Supplementary Movie 2

Description: Representative movie showing single molecule FRET imaging of Cy3-PFV intasome interaction with a Cy5-1nt (5'-P) gap DNA at 100 msec frame rate. Cy3 emission (left); Cy5 emission (right).
